# Supplementary material for: From House Money to Core Funds: Modeling Risk Attitudes in Consecutive Poker Hands
Source: Research Square preprint supplement (doi:10.21203/rs.3.rs-6710385/v1), 2025-06-20
Supplement: Supplementary file 1 [file cb9b8c27f3b667cc3d65ca32.docx]

Author Bio

**Name**: Shreyas Balasubramanian

**Email**: Shreyas Balasubramanian is an undergraduate student pursuing a Bachelor of Science in Economics and Finance at Ashoka University, India. His research interests lie at the intersection of behavioral economics and financial decision‑making, with a particular focus on risk attitudes and framing effects in sequential choice environments such as poker and financial markets.
